# Supplementary material for: Surgical Approach and Long-Term Recurrence After Ventral Hernia Repair
Source: PubMed Central journal article supplement (PMC11170458; doi:10.1001/jamasurg.2024.1696), 2024-06-12
Supplement: jamasurg-e241696-s001.pdf [file jamasurg-e241696-s001.pdf]

## Supplemental Online Content

Fry BT, Howard RA, Thumma JR, Norton EC, Dimick JB, Sheetz KH. Surgical approach and long-term recurrence after ventral hernia repair. *JAMA Surg*. Published online June 12, 2024. doi:10.1001/jamasurg.2024.1696

**eFigure 1.** Stepwise Patient Inclusion and Exclusion and Final Index Ventral Hernia Repair Cohort Study Size

**eFigure 2.** Yearly Distribution of Elective, Inpatient Ventral, Incisional, and Umbilical Hernia Repairs From 2010-2020, by Approach

**eMethods 1.** Race and Ethnicity Use in Medicare Claims Database

**eMethods 2.** Selection of Instrumental Variable and Intuition for Instrumental Variable Analysis

**eTable 1.** ICD-9, ICD-10, and CPT Codes Used to Identify Initial Hernia Repair Operation and Reoperation

**eTable 2.** Covariate Balance Grouped by Actual Treatment and by Above and Below Median of Prior Year Robotic-Assisted Use Rate for Robotic-Assisted vs Laparoscopic Approaches

**eTable 3.** Covariate Balance Grouped by Actual Treatment and by Above and Below Median of Prior Year Robotic-Assisted Use Rate for Robotic-Assisted vs Open Approaches

**eReferences**

This supplemental material has been provided by the authors to give readers additional information about their work.

**eFigure 1.** Stepwise Patient Inclusion and Exclusion and Final Index Ventral Hernia Repair Cohort Study Size

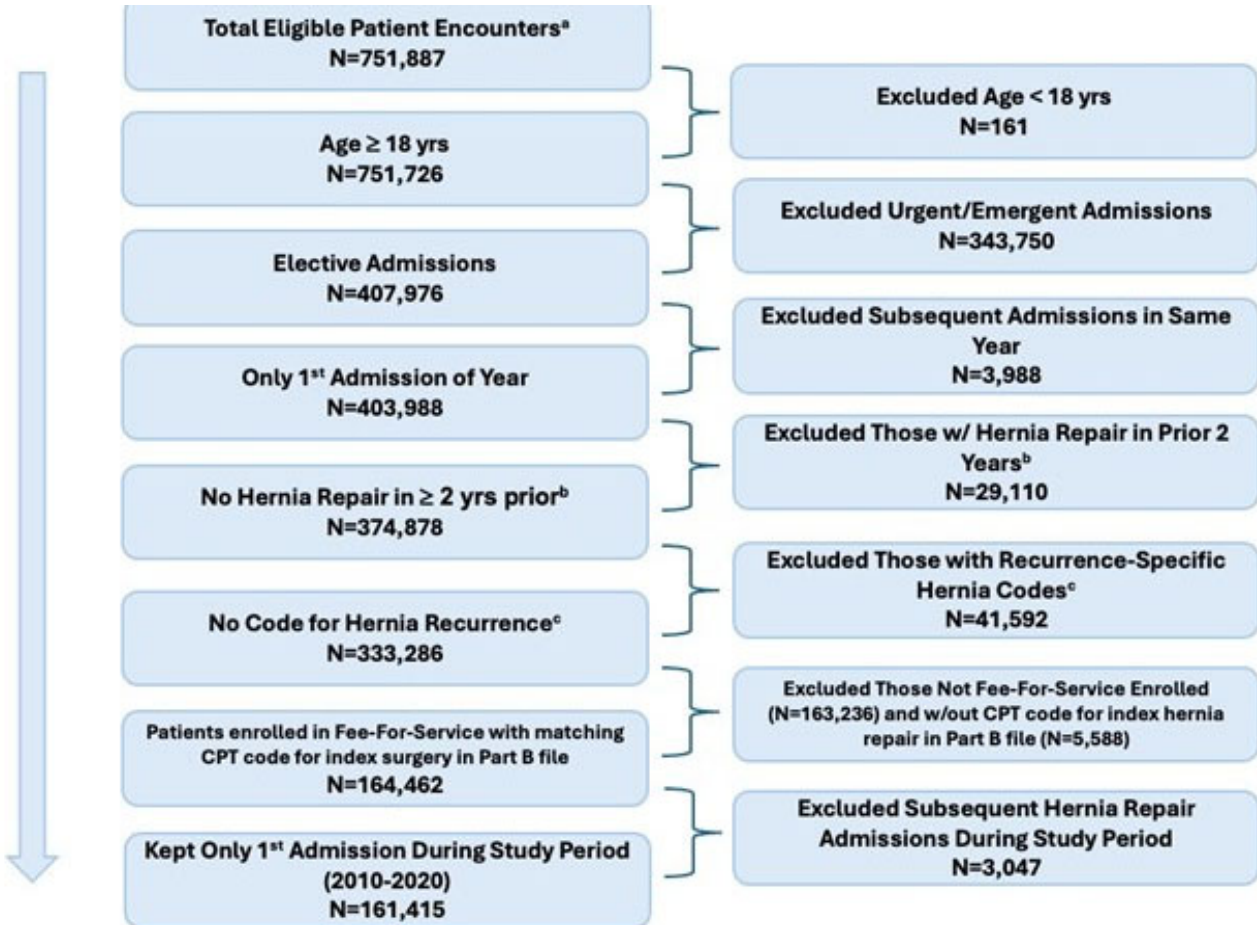

<sup>a</sup>Patients initially identified using International Classification of Diseases 9th and 10th Edition (ICD-9/10) procedure codes, which were cross referenced with the corresponding ICD-9/10 diagnosis codes (**eTable 1 in Supplement**)

<sup>b</sup>Because not all recurrent hernias repairs are coded as such, we reduced the possibility of mis-identifying index hernia repairs by excluding patients with an additional ventral hernia repair admission dating back to 2008, or at least the 2 years prior to their year of index surgery.

<sup>c</sup>Recurrent hernia specific Current Procedural Terminology (CPT) codes were 49565, 49566, 49656, 49657

**eFigure 2.** Yearly Distribution of Elective, Inpatient Ventral, Incisional, and Umbilical Hernia Repairs From 2010-2020, by Approach

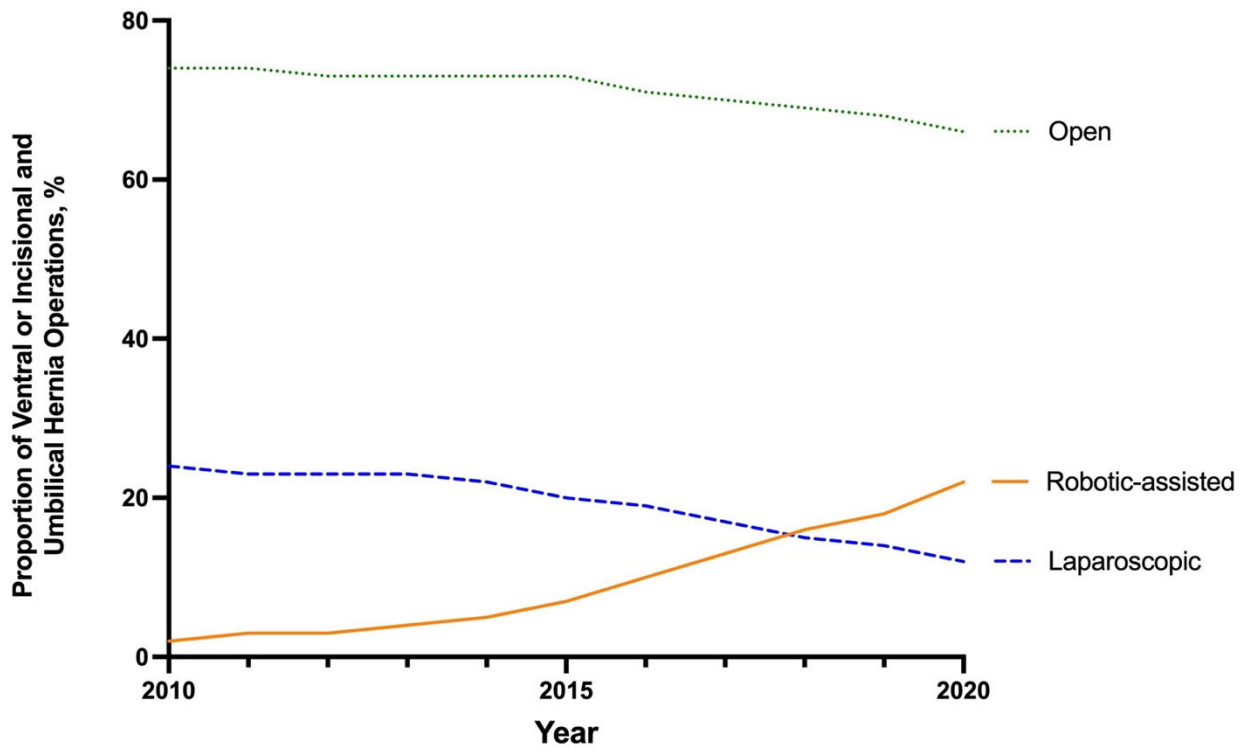

## **eMethods 1. Race and Ethnicity Use in Medicare Claims Database**

Patient race and ethnicity are included as identifiers in the Medicare claims database.<sup>1</sup> These identifiers were used to identify patient race and ethnicity in this study, and are represented in the following standard, fixed categories: Asian, Black, Hispanic, North American Native, White, other race/ethnicity, and unknown race/ethnicity. Only a single category could be selected during our study period, and no additional information is available in Medicare claims data regarding the composition of the “other race” category. Race and ethnicity were included as they have been found to be associated with the presentation, management, and outcomes of hernias and hernia repair.<sup>2-4</sup>

## **eMethods 2. Selection of Instrumental Variable and Intuition for Instrumental Variable Analysis**

As mentioned in the main text of the manuscript, due to measured and unmeasured confounding in observational data, causal inference may be limited (e.g., due to selection bias). For example, surgeons may choose an open approach for large complex hernias in sicker patients versus a minimally invasive approach (robotic-assisted or laparoscopic) for small simple hernias in healthy patients. Moreover, there are surgeons with robotic expertise who may use the technology to perform more complex hernia repairs that could not otherwise be performed in a minimally invasive fashion; conversely, surgeons uncomfortable with performing laparoscopic hernia repair may use the robot for simple, straightforward hernias to provide a minimally invasive alternative for an operation that would have otherwise been performed open. We cannot account for these biases with standard multivariable logistic regression analysis, as it can only adjust for measured covariates. To mitigate this, an instrumental variable (IV) analysis identifies robotic-assisted hernia repair patients who would have otherwise undergone an open or laparoscopic approach at a different institution. The IV is an exogenous factor associated with the likelihood of receiving a particular treatment without affecting the treatment outcome. In turn, this effectively randomizes treatment for a subset of patients which improves causal inference from observational data.

The instrumental variable used for our analysis was the robotic-assisted ventral hernia repair utilization rate within a hospital referral region in the 12 months prior to a patient's initial ventral hernia repair. The use of prior year state/regional level procedural utilization as an IV is consistent with previous observational studies in bariatric, colorectal, and vascular surgery patients.

**eTable 1. ICD-9, ICD-10, and CPT Codes Used to Identify Initial Hernia Repair Operation and Reoperation<sup>a</sup>**

|                               |                                                                                                                            |
|-------------------------------|----------------------------------------------------------------------------------------------------------------------------|
| <b>ICD-9 Diagnosis Codes</b>  | 551.1, 551.2, 551.20, 551.21, 551.29, 552.1, 552.2, 552.20, 552.21, 552.29, 553.1, 553.2, 553.20, 553.21, 553.29           |
| <b>ICD-9 Procedure Codes</b>  | 53.4, 53.41, 53.42, 53.43, 53.49, 53.5, 53.51, 53.59, 53.6, 53.61, 53.62, 53.63, 53.69                                     |
| <b>ICD-10 Diagnosis Codes</b> | K42, K42.0, K42.1, K42.9, K43, K43.0, K43.1, K43.2, K43.6, K43.7, K43.9                                                    |
| <b>ICD-10 Procedure Codes</b> | 0WQF0ZZ, 0WMF0ZZ, 0WQF0ZZ, 0WQF3ZZ, 0WQF4ZZ, 0WQFXZZ, 0WUF07Z, 0WUF0JZ, 0WUF0KZ, 0WUF47Z, 0WUF4JZ, 0WUF4KZ                 |
| <b>CPT Codes</b>              | 49560, 49561, 49585, 49587, 49652, 49653, 49654, 49655, 49570, 49572                                                       |
| <b>Robotic-assisted Codes</b> | ICD-9: 1741, 1742, 1743, 1744, 1749<br>ICD-10: 8E0W0CZ, 8E0W3CZ, 8E0W4CZ, 8E0W4CZ, 8E0W7CZ, 8E0W8CZ, 8E0WXCZ<br>CPT: S2900 |

ICD-9: International Classification of Diseases 9 Edition; ICD-10: International Classification of Diseases 10th Edition; CPT: Current Procedural Terminology.

<sup>a</sup>Operative hernia recurrences were identified using the same codes, in addition to 4 additional CPT codes excluded from the initial operation that specifically identify recurrent hernia repair: 49565, 49566, 49656, 49657.

**eTable 2.** Covariate Balance Grouped by Actual Treatment and by Above and Below Median of Prior Year Robotic-Assisted Use Rate for Robotic-Assisted vs Laparoscopic Approaches<sup>a,b</sup>

|                                                | Actual Treatment            |                         |                                          |         | Prior Year Robotic-Assisted Ventral Hernia Repair Utilization Rate <sup>c</sup> |                         |                                          |         |
|------------------------------------------------|-----------------------------|-------------------------|------------------------------------------|---------|---------------------------------------------------------------------------------|-------------------------|------------------------------------------|---------|
|                                                | Robotic-Assisted (N=12,693) | Laparoscopic (N=32,542) | Standardized Difference (%) <sup>d</sup> | P-Value | Above median (N=80,943)                                                         | Below Median (N=80,472) | Standardized Difference (%) <sup>d</sup> | P-Value |
| Age, mean (SD)                                 | 69.9 (8.9)                  | 68.5 (11.1)             | 14.4                                     | <.0001  | 69.2 (10.5)                                                                     | 68.7 (11.2)             | 4.5                                      | <.0001  |
| Female                                         | 5810 (45.8)                 | 19992 (61.4)            | 31.8                                     | <.0001  | 46055 (56.9)                                                                    | 47768 (59.4)            | 5                                        | <.0001  |
| <i>Race/Ethnicity</i>                          |                             |                         |                                          |         |                                                                                 |                         |                                          |         |
| White                                          | 10911 (86)                  | 28285 (86.9)            | 2.8                                      | 0.007   | 69178 (85.5)                                                                    | 70001 (87)              | 4.4                                      | <.0001  |
| Black                                          | 1048 (8.3)                  | 2707 (8.3)              | 0.2                                      | 0.83    | 6803 (8.4)                                                                      | 7082 (8.8)              | 1.4                                      | 0.005   |
| Hispanic                                       | 227 (1.8)                   | 593 (1.8)               | 0.3                                      | 0.808   | 1756 (2.2)                                                                      | 1399 (1.7)              | 3.1                                      | <.0001  |
| 2+ Elixhauser Comorbidities                    | 8337 (65.7)                 | 22396 (68.8)            | 6.7                                      | <.0001  | 57898 (71.5)                                                                    | 54694 (68)              | 7.8                                      | <.0001  |
| Hypertension                                   | 8640 (68.1)                 | 22072 (67.8)            | 0.5                                      | 0.619   | 55172 (68.2)                                                                    | 53051 (65.9)            | 4.8                                      | <.0001  |
| Fluid/electrolyte disorders                    | 1565 (12.3)                 | 3571 (11)               | 4.2                                      | <.0001  | 13099 (16.2)                                                                    | 11175 (13.9)            | 6.4                                      | <.0001  |
| Diabetes without chronic complications         | 2415 (19)                   | 8077 (24.8)             | 14                                       | <.0001  | 16548 (20.4)                                                                    | 20083 (25)              | 10.8                                     | <.0001  |
| Chronic pulmonary disease                      | 2683 (21.1)                 | 8014 (24.6)             | 8.3                                      | <.0001  | 18999 (23.5)                                                                    | 18841 (23.4)            | 0.1                                      | 0.78    |
| Obesity                                        | 3281 (25.8)                 | 7606 (23.4)             | 5.8                                      | <.0001  | 20899 (25.8)                                                                    | 17021 (21.2)            | 11                                       | <.0001  |
| Hypothyroidism                                 | 1861 (14.7)                 | 5215 (16)               | 3.8                                      | <.0001  | 13383 (16.5)                                                                    | 11608 (14.4)            | 5.8                                      | <.0001  |
| Anemias                                        | 1211 (9.5)                  | 2915 (9)                | 2                                        | 0.053   | 9842 (12.2)                                                                     | 8497 (10.6)             | 5                                        | <.0001  |
| Renal failure                                  | 1405 (11.1)                 | 3304 (10.2)             | 3                                        | 0.004   | 10513 (13)                                                                      | 8199 (10.2)             | 8.8                                      | <.0001  |
| Congestive heart failure                       | 920 (7.2)                   | 2372 (7.3)              | 0.2                                      | 0.88    | 6683 (8.3)                                                                      | 5972 (7.4)              | 3.1                                      | <.0001  |
| Depression                                     | 1400 (11)                   | 4270 (13.1)             | 6.4                                      | <.0001  | 10379 (12.8)                                                                    | 9137 (11.4)             | 4.5                                      | <.0001  |
| Diabetes with chronic complications            | 1076 (8.5)                  | 1695 (5.2)              | 13                                       | <.0001  | 6962 (8.6)                                                                      | 2824 (3.5)              | 21.5                                     | <.0001  |
| Liver disease                                  | 428 (3.4)                   | 1563 (4.8)              | 7.2                                      | <.0001  | 4249 (5.2)                                                                      | 2914 (3.6)              | 7.9                                      | <.0001  |
| Other neurological disorders                   | 492 (3.9)                   | 1523 (4.7)              | 4                                        | <.0001  | 4078 (5)                                                                        | 3699 (4.6)              | 2.1                                      | <.0001  |
| Peripheral vascular disease                    | 511 (4)                     | 1577 (4.8)              | 4                                        | <.0001  | 4193 (5.2)                                                                      | 4107 (5.1)              | 0.3                                      | 0.486   |
| Valvular disease                               | 556 (4.4)                   | 1522 (4.7)              | 1.4                                      | 0.176   | 3935 (4.9)                                                                      | 3552 (4.4)              | 2.1                                      | <.0001  |
| Weight loss                                    | 263 (2.1)                   | 535 (1.6)               | 3.2                                      | 0.002   | 2716 (3.4)                                                                      | 2439 (3)                | 1.8                                      | <.0001  |
| Coagulopathy                                   | 299 (2.4)                   | 629 (1.9)               | 2.9                                      | 0.004   | 2365 (2.9)                                                                      | 1948 (2.4)              | 3.1                                      | <.0001  |
| Rheumatoid arthritis/collagen vascular disease | 354 (2.8)                   | 1017 (3.1)              | 2                                        | 0.061   | 2692 (3.3)                                                                      | 2412 (3)                | 1.9                                      | <.0001  |
| Psychoses                                      | 262 (2.1)                   | 907 (2.8)               | 4.7                                      | <.0001  | 2280 (2.8)                                                                      | 2298 (2.9)              | 0.2                                      | 0.638   |
| Solid tumor without metastasis                 | 267 (2.1)                   | 470 (1.4)               | 5                                        | <.0001  | 1941 (2.4)                                                                      | 1425 (1.8)              | 4.4                                      | <.0001  |
| Metastatic cancer                              | 300 (2.4)                   | 344 (1.1)               | 10.1                                     | <.0001  | 2297 (2.8)                                                                      | 1999 (2.5)              | 2.2                                      | <.0001  |

<sup>a</sup>Median of the instrumental variable was 4.79% with a mean of 7.82% (SD 8.7%)

<sup>b</sup>All values represented as N (%) unless otherwise indicated. Only covariates with at least 2% prevalence in either approach reported.

<sup>c</sup>Prior year robotic-assisted ventral hernia repair utilization rate was the instrumental variable used in the analysis. This was evaluated at the hospital referral region level and calculated for the 12 months prior to each patient's initial hernia repair.

<sup>d</sup>Standardized difference equals mean difference divided by pooled standard deviation

**eTable 3.** Covariate Balance Grouped by Actual Treatment and by Above and Below Median of Prior Year Robotic-Assisted Use Rate for Robotic-Assisted vs Open Approaches<sup>a,b</sup>

|                                                | Actual Treatment            |                  |                                          |         | Prior Year Robotic-Assisted Ventral Hernia Repair Utilization Rate <sup>c</sup> |                         |                                          |         |
|------------------------------------------------|-----------------------------|------------------|------------------------------------------|---------|---------------------------------------------------------------------------------|-------------------------|------------------------------------------|---------|
|                                                | Robotic-Assisted (N=12,693) | Open (N=116,180) | Standardized Difference (%) <sup>d</sup> | P-Value | Above median (N=80,943)                                                         | Below Median (N=80,472) | Standardized Difference (%) <sup>d</sup> | P-Value |
| Age, mean (SD)                                 | 69.9 (8.9)                  | 69.0 (10.9)      | 9.1                                      | <.0001  | 69.2 (10.5)                                                                     | 68.7 (11.2)             | 4.5                                      | <.0001  |
| Female                                         | 5810 (45.8)                 | 68021 (58.5)     | 25.8                                     | <.0001  | 46055 (56.9)                                                                    | 47768 (59.4)            | 5                                        | <.0001  |
| <i>Race/Ethnicity</i>                          |                             |                  |                                          |         |                                                                                 |                         |                                          |         |
| White                                          | 10911 (86)                  | 99983 (86.1)     | 0.3                                      | 0.762   | 69178 (85.5)                                                                    | 70001 (87)              | 4.4                                      | <.0001  |
| Black                                          | 1048 (8.3)                  | 10130 (8.7)      | 1.7                                      | 0.079   | 6803 (8.4)                                                                      | 7082 (8.8)              | 1.4                                      | 0.005   |
| Hispanic                                       | 227 (1.8)                   | 2335 (2)         | 1.6                                      | 0.09    | 1756 (2.2)                                                                      | 1399 (1.7)              | 3.1                                      | <.0001  |
| 2+ Elixhauser Comorbidities                    | 8337 (65.7)                 | 81859 (70.5)     | 10.3                                     | <.0001  | 57898 (71.5)                                                                    | 54694 (68)              | 7.8                                      | <.0001  |
| Hypertension                                   | 8640 (68.1)                 | 77511 (66.7)     | 2.9                                      | 0.002   | 55172 (68.2)                                                                    | 53051 (65.9)            | 4.8                                      | <.0001  |
| Fluid/electrolyte disorders                    | 1565 (12.3)                 | 19138 (16.5)     | 11.8                                     | <.0001  | 13099 (16.2)                                                                    | 11175 (13.9)            | 6.4                                      | <.0001  |
| Diabetes without chronic complications         | 2415 (19)                   | 26139 (22.5)     | 8.6                                      | <.0001  | 16548 (20.4)                                                                    | 20083 (25)              | 10.8                                     | <.0001  |
| Chronic pulmonary disease                      | 2683 (21.1)                 | 27143 (23.4)     | 5.4                                      | <.0001  | 18999 (23.5)                                                                    | 18841 (23.4)            | 0.1                                      | 0.78    |
| Obesity                                        | 3281 (25.8)                 | 27033 (23.3)     | 6                                        | <.0001  | 20899 (25.8)                                                                    | 17021 (21.2)            | 11                                       | <.0001  |
| Hypothyroidism                                 | 1861 (14.7)                 | 17915 (15.4)     | 2.1                                      | 0.024   | 13383 (16.5)                                                                    | 11608 (14.4)            | 5.8                                      | <.0001  |
| Anemias                                        | 1211 (9.5)                  | 14213 (12.2)     | 8.7                                      | <.0001  | 9842 (12.2)                                                                     | 8497 (10.6)             | 5                                        | <.0001  |
| Renal failure                                  | 1405 (11.1)                 | 14003 (12.1)     | 3.1                                      | 0.001   | 10513 (13)                                                                      | 8199 (10.2)             | 8.8                                      | <.0001  |
| Congestive heart failure                       | 920 (7.2)                   | 9363 (8.1)       | 3.1                                      | 0.001   | 6683 (8.3)                                                                      | 5972 (7.4)              | 3.1                                      | <.0001  |
| Depression                                     | 1400 (11)                   | 13846 (11.9)     | 2.8                                      | 0.003   | 10379 (12.8)                                                                    | 9137 (11.4)             | 4.5                                      | <.0001  |
| Diabetes with chronic complications            | 1076 (8.5)                  | 7015 (6)         | 9.4                                      | <.0001  | 6962 (8.6)                                                                      | 2824 (3.5)              | 21.5                                     | <.0001  |
| Liver disease                                  | 428 (3.4)                   | 5172 (4.5)       | 5.6                                      | <.0001  | 4249 (5.2)                                                                      | 2914 (3.6)              | 7.9                                      | <.0001  |
| Other neurological disorders                   | 492 (3.9)                   | 5762 (5)         | 5.3                                      | <.0001  | 4078 (5)                                                                        | 3699 (4.6)              | 2.1                                      | <.0001  |
| Peripheral vascular disease                    | 511 (4)                     | 6212 (5.3)       | 6.3                                      | <.0001  | 4193 (5.2)                                                                      | 4107 (5.1)              | 0.3                                      | 0.486   |
| Valvular disease                               | 556 (4.4)                   | 5409 (4.7)       | 1.3                                      | 0.161   | 3935 (4.9)                                                                      | 3552 (4.4)              | 2.1                                      | <.0001  |
| Weight loss                                    | 263 (2.1)                   | 4357 (3.8)       | 10                                       | <.0001  | 2716 (3.4)                                                                      | 2439 (3)                | 1.8                                      | <.0001  |
| Coagulopathy                                   | 299 (2.4)                   | 3385 (2.9)       | 3.5                                      | <.0001  | 2365 (2.9)                                                                      | 1948 (2.4)              | 3.1                                      | <.0001  |
| Rheumatoid arthritis/collagen vascular disease | 354 (2.8)                   | 3733 (3.2)       | 2.5                                      | 0.01    | 2692 (3.3)                                                                      | 2412 (3)                | 1.9                                      | <.0001  |
| Psychoses                                      | 262 (2.1)                   | 3409 (2.9)       | 5.6                                      | <.0001  | 2280 (2.8)                                                                      | 2298 (2.9)              | 0.2                                      | 0.638   |
| Solid tumor without metastasis                 | 267 (2.1)                   | 2629 (2.3)       | 1.1                                      | 0.25    | 1941 (2.4)                                                                      | 1425 (1.8)              | 4.4                                      | <.0001  |
| Metastatic cancer                              | 300 (2.4)                   | 3652 (3.1)       | 4.8                                      | <.0001  | 2297 (2.8)                                                                      | 1999 (2.5)              | 2.2                                      | <.0001  |

<sup>a</sup>Median of the instrumental variable was 4.79% with a mean of 7.82% (SD 8.7%)

<sup>b</sup>All values represented as N (%) unless otherwise indicated. Only covariates with at least 2% prevalence in either approach reported.

<sup>c</sup>Prior year robotic-assisted ventral hernia repair utilization rate was the instrumental variable used in the analysis. This was evaluated at the hospital referral region level and calculated for the 12 months prior to each patient's initial hernia repair.

<sup>d</sup>Standardized difference equals mean difference divided by pooled standard deviation



## eReferences

1. Race/ethnicity (from Medicare EDB) | ResDAC. Resdac.org. Published 2022. Accessed January 13, 2022. <https://resdac.org/cms-data/variables/raceethnicity-medicare-edb>.
2. Bowman K, Telem DA, Hernandez-Rosa J, Stein N, Williams R, Divino CM. Impact of race and socioeconomic status on presentation and management of ventral hernias. *Arch Surg*. 2010;145(8):776-780.
3. Vu JV, Gunaseelan V, Dimick JB, Englesbe MJ, Campbell DA, Jr., Telem DA. Mechanisms of age and race differences in receiving minimally invasive inguinal hernia repair. *Surg Endosc*. 2019;33(12):4032-4037.
4. Asolati M, Huerta S, Sarosi G, Harmon R, Bell C, Anthony T. Predictors of recurrence in veteran patients with umbilical hernia: single center experience. *Am J Surg*. 2006;192(5):627-630.
