# Supplementary material for: Surgical Approach and Long-Term Recurrence After Ventral Hernia Repair
Source: PubMed Central journal article supplement (PMC11170458; doi:10.1001/jamasurg.2024.1696), 2024-06-12
Supplement: jamasurg-e241696-s002.pdf [file jamasurg-e241696-s002.pdf]

## Data Sharing Statement

Fry. Surgical Approach and Long-Term Recurrence After Ventral Hernia Repair. *JAMA Surg.*  
Published June 12, 2024. doi:10.1001/jamasurg.2024.1696

### Data

**Data available:** No

### Additional Information

**Explanation for why data not available:** We utilized Medicare claims data for this study and are unable to share the data based on our data usage agreement with Centers for Medicare & Medicaid Services.
